# Supplementary material for: In planta proximity dependent biotin identification (BioID)
Source: PubMed Central journal article supplement (PMC6004002; doi:10.1038/s41598-018-27500-3), 2018-06-15
Supplement: 41598_2018_27500_MOESM1_ESM.pdf [file 41598_2018_27500_MOESM1_ESM.pdf]

***In planta* proximity dependent biotin identification (BiOID)**

Madiha Khan<sup>\*1, 2</sup>, Ji-Young Youn<sup>\*3</sup>, Anne-Claude Gingras<sup>3,4</sup>, Rajagopal Subramaniam<sup>2</sup> and Darrell Desveaux<sup>1,5</sup>

\*Authors contributed equally to this paper

<sup>1</sup>Department of Cell and Systems Biology, University of Toronto, Toronto, Ontario M5S 3B2, Canada

<sup>2</sup>Ottawa Research and Development Centre, Agriculture and Agri-Food Canada, Ottawa, Ontario K1A 0C6, Canada

<sup>3</sup>Lunenfeld-Tanenbaum Research Institute, Sinai Health System, Toronto, Ontario M5G 1X5, Canada

<sup>4</sup>Department of Molecular Genetics, University of Toronto, Toronto, Ontario M5S 1A8, Canada

<sup>5</sup>Centre for the Analysis of Genome Evolution and Function, University of Toronto, Toronto, Ontario M5S 3B2, Canada

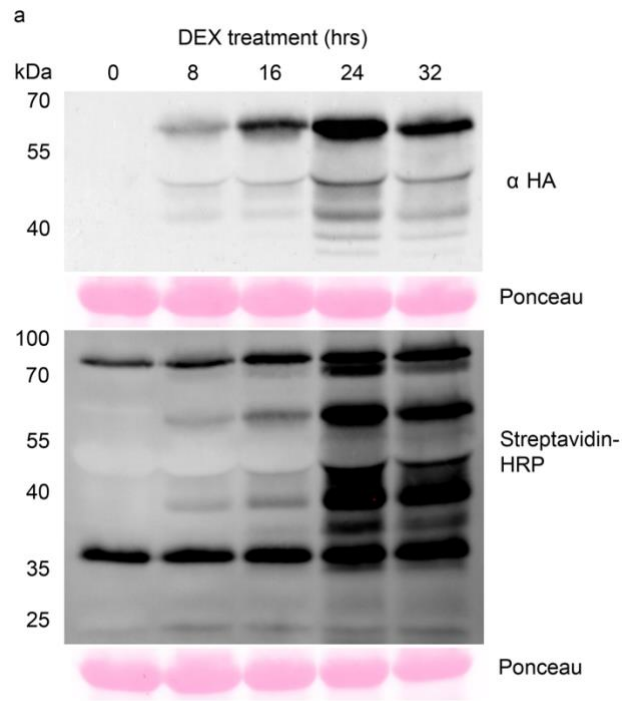

**Supplementary Figure 1:** Time course treatment of HopF2-BirA\* with DEX

Total protein extract from HopF2-BirA\* (60kDa) floated in 30 $\mu$ M DEX for 0, 8, 16, 24, 32 hrs was probed with HA-antibody (top panel) or streptavidin-HRP (bottom panel). Highest HopF2-BirA\* expression and biotin labeling was observed following 24hrs treatment. Ponceau staining is presented as a loading control. (Note that the images were cropped to show relevant samples and uncropped images are available in Supplementary Figure 3).

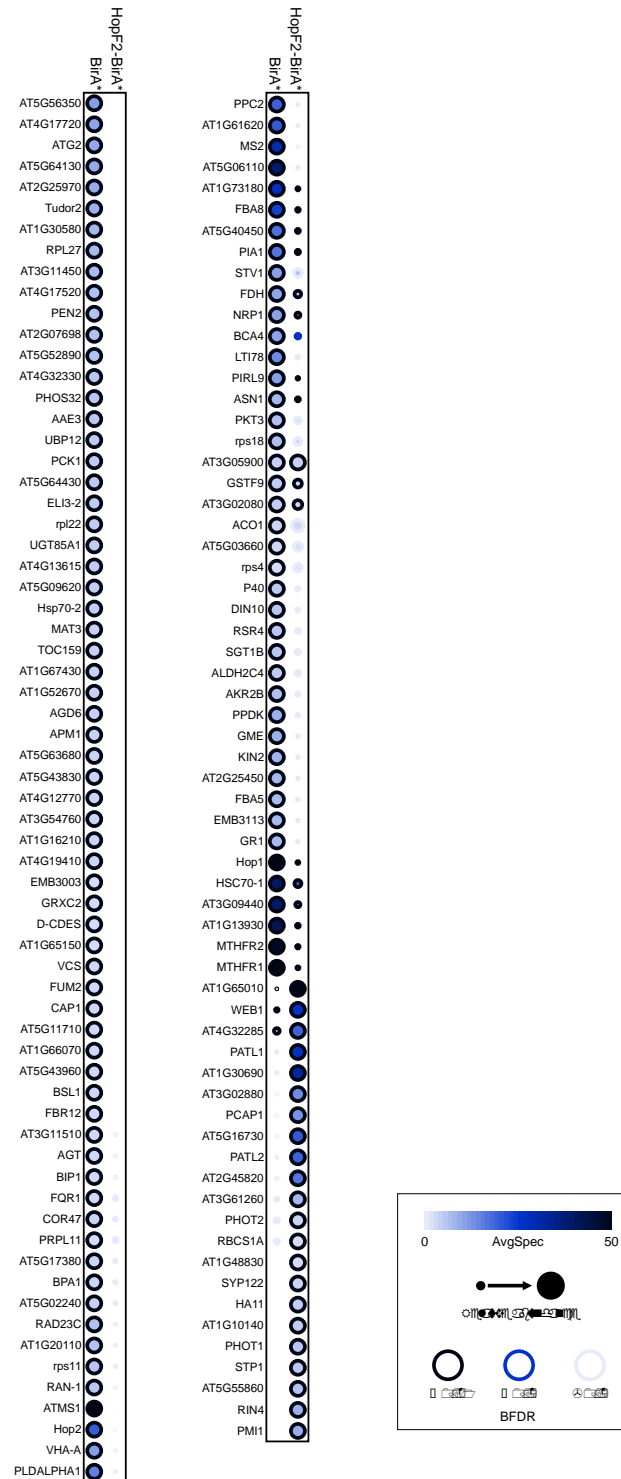

**Supplementary Figure 2:** Dot plot showing total list of prey proteins identified as significant interactors of BirA\* and HopF2-BirA\* by SAINT analysis.

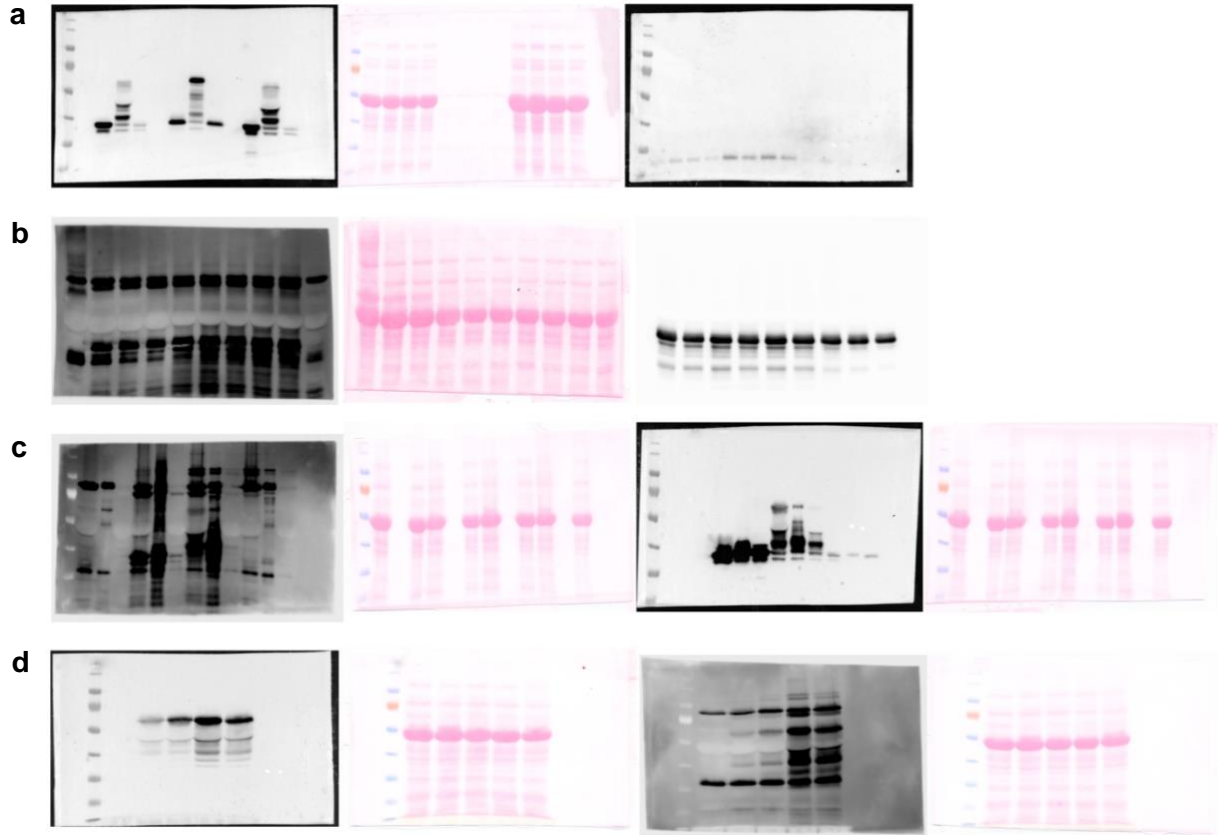

**Supplementary Figure 3: Uncropped Images**

**(a)** Images used in Figure 1a. **(b)** Images used in Figure 1b. **(c)** Images used in Figure 1c. **(d)** Images used in Supplementary Figure 1.

**Supplementary Table 1: Significant Preys identified in BirA\* but not in HopF2-BirA\***

| <b>Preys</b> | <b>Common Name</b> | <b>Localization<sup>a,b</sup></b> | <b>Identified by AP-MS<sup>c,d</sup></b> |
|--------------|--------------------|-----------------------------------|------------------------------------------|
| At5g56350    |                    | Non-membrane                      |                                          |
| At4g17720    |                    | Non-membrane                      |                                          |
| At3g51800    | ATG2               | Non-membrane                      |                                          |
| At5g64130    |                    | Membrane                          |                                          |
| At2g25970    |                    | Non-membrane                      |                                          |
| At5g61780    | Tudor2             | Non-membrane                      |                                          |
| At1g30580    |                    | Non-membrane                      |                                          |
| At5g40950    | RPL27              | Non-membrane                      |                                          |
| At3g11450    |                    | N/A                               |                                          |
| At4g17520    | RGGB               | Non-membrane                      |                                          |
| At2g07698    |                    | Membrane                          |                                          |
| At5g52890    |                    | N/A                               |                                          |
| At2g44490    | PEN2               | Membrane                          |                                          |
| At5g54430    | PHOS32             | Membrane                          |                                          |
| At4g32330    | WDL5               | Non-membrane                      |                                          |
| At3g48990    | AAE3               | Non-membrane                      |                                          |
| At5g64430    |                    | Non-membrane                      |                                          |
| At4g37990    | ELI3-2             | N/A                               |                                          |
| At4g37870    | PCK1               | Membrane                          |                                          |
| At5g06600    | UBP12              | Non-membrane                      |                                          |
| At5g02490    | Hsp70-2            | Membrane                          | Yes (gi 12323026)                        |
| At4g13615    |                    | N/A                               |                                          |
| At5g09620    |                    | N/A                               |                                          |
| At1g22400    | UGT85A1            | Non-membrane                      |                                          |
| AtCg00810    | rpl22              | Non-membrane                      |                                          |
| At2g36880    | MAT3               | Membrane                          |                                          |
| At4g02510    | TOC159             | Membrane                          |                                          |
| At1g67430    | RPL17B             | Membrane                          |                                          |
| At1g52670    | BLP1               | Non-membrane                      |                                          |
| At3g53710    | AGD6               | Non-membrane                      |                                          |
| At4g33090    | APM1               | Membrane                          |                                          |
| At4g19410    | PAE7               | Membrane                          |                                          |
| At4g12770    |                    | Membrane                          |                                          |
| At3g54760    |                    | Non-membrane                      |                                          |
| At1g16210    |                    | N/A                               |                                          |
| At5g43830    |                    | Non-membrane                      |                                          |
| At5g63680    |                    | Membrane                          |                                          |
| At5g40370    | GRXC2              | Non-membrane                      |                                          |
| At1g34430    | EMB3003            | Membrane                          |                                          |
| At1g48420    | D-CDES             | Non-membrane                      |                                          |
| At1g65150    |                    | N/A                               |                                          |
| At3g13300    | VCS                | Non-membrane                      | Yes (gi 9294536)                         |
| At4g34490    | CAP1               | Non-membrane                      |                                          |
| At4g03080    | BSL1               | Membrane                          |                                          |
| At5g43960    |                    | Non-membrane                      |                                          |
| At5g11710    |                    | Non-membrane                      |                                          |
| At1g66070    | eIF3j              | Membrane                          |                                          |
| At5g50950    | FUM2               | Non-membrane                      |                                          |

|           |           |              |                  |
|-----------|-----------|--------------|------------------|
| At1g26630 | FBR12     | Non-membrane |                  |
| At3g11510 | RPS14B    | Non-membrane |                  |
| At2g13360 | AGT       | Membrane     |                  |
| At5g28540 | BIP1      | Membrane     |                  |
| At5g54500 | FQR1      | Membrane     | Yes (gi 8885593) |
| At1g20440 | COR47     | Non-membrane | Yes (gi 556474)  |
| At1g32990 | PRPL11    | Membrane     |                  |
| At5g17380 | HACL      | Non-membrane |                  |
| At5g16840 | BPA1      | Membrane     |                  |
| At5g02240 |           | Membrane     |                  |
| At5g20010 | RAN-1     | Membrane     |                  |
| AtCg00750 | rps11     | Non-membrane |                  |
| At3g02540 | RAD23C    | Non-membrane |                  |
| At1g20110 | FYVE1     | Membrane     |                  |
| At3g24170 | GR1       | Non-membrane |                  |
| At2g33800 | EMB3113   | Membrane     |                  |
| At4g26530 | FBA5      | Non-membrane |                  |
| At2g25450 | GSL-OH    | Non-membrane |                  |
| At5g15970 | KIN2      | Membrane     |                  |
| At5g28840 | GME       | Non-membrane |                  |
| At4g15530 | PPDK      | Non-membrane |                  |
| At2g17390 | AKR2B     | Membrane     |                  |
| At3g24503 | ALDH2C4   | Non-membrane |                  |
| At4g11260 | SGT1B     | Non-membrane |                  |
| At5g01410 | RSR4      | Membrane     |                  |
| At5g20250 | DIN10     | N/A          |                  |
| At1g72370 | P40       | Membrane     |                  |
| AtCg00380 | rps4      | Non-membrane |                  |
| At5g03660 |           | Membrane     |                  |
| At4g35830 | ACO1      | Membrane     |                  |
| AtCg00650 | rps18     | Non-membrane |                  |
| At2g33150 | PKT3      | Membrane     |                  |
| At5g52310 | LT178     | Non-membrane | Yes (gi 16390)   |
| At3g53020 | STV1      | Non-membrane |                  |
| At5g06110 | ATGLSA2   | N/A          |                  |
| At5g17920 | ATMS1     | Membrane     |                  |
| At1g62740 | Hop2      | Membrane     |                  |
| At1g78900 | VHA-A     | Membrane     | Yes (gi 2266990) |
| At3g15730 | PLDALPHA1 | Membrane     |                  |
| At3g03780 | MS2       | Membrane     |                  |
| At2g42600 | PPC2      | Membrane     |                  |
| At1g61620 | CSU1      | Non-membrane |                  |
| At1g70410 | BCA4      | Membrane     |                  |

<sup>a</sup> Membrane or non-membrane based on subcellular localization information on Uniprot.org.

<sup>b</sup> 43.33% of BirA\*-specific preys are membrane localized

<sup>c</sup> Identified in the AP-MS data of Hurley et al., 2014, in at least one HopF2 replicate and not in the negative control<sup>15</sup>

<sup>d</sup> 6.59% of BirA\*-specific preys were also identified by AP-MS<sup>15</sup>.

**Supplementary Table 2: Significant Prey proteins common to HopF2-BirA\* and BirA\***

| Preys                  | Common Name | Localization <sup>a,b</sup> | Identified by AP-MS <sup>c,d</sup> |
|------------------------|-------------|-----------------------------|------------------------------------|
| At1g65010 <sup>▼</sup> |             | Non-membrane                |                                    |
| At2g26570 <sup>▼</sup> | WEB1        | Membrane                    |                                    |
| At4g32285 <sup>▼</sup> |             | Membrane                    | Yes (gi 2864615)                   |
| At3g05900 <sup>△</sup> |             | Membrane                    |                                    |
| At3g02080 <sup>¥</sup> | RPS19A      | Non-membrane                |                                    |
| At2g30860 <sup>¥</sup> | GSTF9       | Membrane                    |                                    |
| At3g47340 <sup>¥</sup> | ASN1        | N/A                         |                                    |
| At3g11330 <sup>¥</sup> | PIRL9       | N/A                         |                                    |
| At1g12270 <sup>¥</sup> | Hop1        | Non-membrane                |                                    |
| At2g03440 <sup>¥</sup> | NRP1        | N/A                         |                                    |
| At5g14780 <sup>¥</sup> | FDH         | Non-membrane                |                                    |
| At2g20630 <sup>¥</sup> | PIA1        | N/A                         |                                    |
| At5g40450 <sup>¥</sup> |             | N/A                         |                                    |
| At3g52930 <sup>¥</sup> | FBA8        | Membrane                    |                                    |
| At1g73180 <sup>¥</sup> |             | Membrane                    |                                    |
| At5g02500 <sup>¥</sup> | HSC70-1     | Membrane                    |                                    |
| At3g09440 <sup>¥</sup> | HSC70-3     | Membrane                    | Yes (gi 3043415)                   |
| At1g13930 <sup>¥</sup> |             | Membrane                    |                                    |
| At2g44160 <sup>¥</sup> | MTHFR2      | Non-membrane                |                                    |
| At3g59970 <sup>¥</sup> | MTHFR1      | Non-membrane                |                                    |

<sup>a</sup> Membrane or non-membrane based on subcellular localization information on Uniprot.org.

<sup>b</sup> 45% of preys common to HopF2-BirA\* and BirA\* are membrane localized

<sup>c</sup> Identified in the AP-MS data of Hurley et al., 2014, in at least one HopF2 replicate and not in the negative control<sup>15</sup>

<sup>d</sup> 10% of preys common to HopF2-BirA\* and BirA\* were also identified by AP-MS<sup>15</sup>.

<sup>▼</sup> Higher abundance in HopF2-BirA\*

<sup>△</sup> Equal abundance in HopF2-BirA\* and BirA\*

<sup>¥</sup> Higher abundance in BirA\*
